# Supplementary material for: Functional insight into Maelstrom in the germline piRNA pathway: a unique domain homologous to the DnaQ-H 3'–5' exonuclease, its lineage-specific expansion/loss and evolutionarily active site switch
Source: PubMed Central journal article supplement (PMC2628886; doi:10.1186/1745-6150-3-48), 2008-11-25
Supplement: 1745-6150-3-48-S1.pdf [file 1745-6150-3-48-S1.pdf]

>Am\_110759058 (71-301) LNLKREQE**FQOKMLQY**IDSVVS--MGLLHNT**EFAVAQF**---S**ENG**--VENI**YHEVLKMKIP**---LGMKRD**AETSQQTHQ**---PIELE---DG**QSD**-FSYMF**NELTKFLESN**--KTGNKFP**PLFTAKD**---LS  
>Ag\_118793711 (106-335) KNV**LEKQEFYFIS**MAY**FCRIN**---T**GVHL**AR**LAVLVRY**---S**EGG**--VKDK**LHMF**IN**GRLP**---IGMAY**DAQRHAEDHQ**---PLPPNA---MGV**SD**-YGD**VAMRLSFL**LQN----DDM**PLLETFET**---DI  
>Aa\_108883695 (5-235) PKELEK**LEFYFIS**FAY**FCVTS**---GGTY**LEARMGLVRY**---S**KDG**--VMDK**LHMF**ID**GKLP**---LGMAY**DAQHSES**DHQ---PIPPDA---K**GEKD**-NDE**ILKLFSP**L**SQQ**----EKMP**PLLETFET**---DI  
>Aa\_108875394 (112-344) NNAL**EKLEVFVMS**CNY**FCRIS**---T**EAFV**AR**LALIKY**---N**ELG**--VLDK**LHMF**IN**VRPL**---LGLA**HEALYS**EQ**THEI**---PTPPNA---M**GETD**-FYT**LQKILS**FD**YDN**---SKPHK**LALIM**DAK---EV  
>Cp\_170030346 (115-348) NNAL**ELELVVFS**CNY**FCVSL**---S**GEYV**AR**LALIKY**---S**NDG**--VMD**SLNVL**IN**TDLP**---LGMAL**DAKTHS**ST**HQ**---VPVPPDA---L**GEAN**-Y**EKILRQILK**FF**KNT**---SGSK**VVPLLE**TW**NK**---DI  
>Cp\_170031325 (116-346) S**NLEKVEFF**FIS**FAYFCVTS**---NGTY**LEARMGLVRY**---S**RDG**--VKDR**LHMF**ID**GKLP**---LGF**SYDAK**VH**SESDHG**---PIPPDA---M**GEKD**-NDE**LVLRFLN**FL**SQGG**----EKMP**PLLETFET**---EI  
>Cp\_170031446 (1-207) -----MAL**AKY**---S**ETG**--VM**AKTMEY**IN**QKIP**---LGLAL**DAITWSE**TH**R**---VPVPPD**S**---K**GETD**-F**SVLLEKILN**FD**FEE**-E**KKCKN**FL**LE**TF**DAK**---DV  
>Nv\_156543251 (105-307) -----N**PDN**-EK**ARYK**TA**KQ**TK**EQPIK**L**GF**T**SM**A**KD**HS**SN**TH**E**---PL**NPP**---F**GKNN**-Y**QETFKD**IC**KF**EP**G**---K**KNGLL**PP**VY**TM**HT**---V  
>L1\_83933914 A**QKISSKT**Y**V**VI**H**IN**YFC**Q**SR**(4)**R**PH**YD**AA**EL**L**AL**LD**F**---S**EDG**--IKR**GMH**TF**ML**KL**DTLP**---Y**GSF**EA**TRH**ND**THQ**---PL**PPDT**---I**GQTT**-T**REAV**LE**V**IN**F**SE**V**---D**DDVCP**PL**IF**TD**D**---HI  
>Gm\_78540983 -----L**AVNY**FT**K**IL**K**---GN**YV**AR**LSV**CE**Y**---S**KQG**--VNR**I**FT**HL**IN**GTNV**---Y**GHQ**Y**EA**QH**HS**ET**THN**---PL**PPNA**---M**GDEN**-L**GTI**NE**V**L**K**FL**GAT**---D**EYPP**LV**T**RE---NI  
>Dp\_67840782 -----M**IN**:GH**II**---Y**GQ**SR**DA**Q**D**HS**K**TT**HK**L---PL**PQA**---F**GETN**-M**GK**L**Y**DI**FN**W**LS**VR(4)**L**D**QD**VP**VI**Y**TT**PE---L**M**  
>Dy\_33328997 (87-323) SYD**LENAK**V**F**AT**F**NY**FTK**ALT---T**DVYV**AR**FA**ACE**Y**---S**KEG**--VRS**IY**ST**MD**:Q**QII**---F**GQ**SD**A**L**HS**ST**HD**---PL**PPNA**---L**GEKN**-M**AK**L**Y**R**N**I**V**C**YL**TK**C**---Q**GAD**K**PLI**V**FT**PE---N**I**  
>Tc\_91081127 (107-337) ATD**L**DE**KI**FL**VI**H**IN**H**L**AY**PT**---E**DKY**FI**CH**IA**IA**AV---S**KNG**--V**EDV**F**HR**I**V**K**G**KL**P**---L**G**Y**GG**AL**TH**SK**ETH**Q**ML**EL**VQ**DE---P**Y**EN**N**-T**RE**V**FN**EM**T**S**FL**KL**W**---R**GK**GS**DS**I**V**Y**AD**E**K**---T**H**  
>Dm\_21429066 (102-338) SHD**LENAK**V**F**V**AF**NY**FTK**ALT---T**DVYV**AR**FA**ACE**Y**---S**KEG**--I**RSI**Y**ST**MD**:Q**Q**II**---F**GQ**SD**A**L**HS**ST**HD**---PL**PPNA**---L**GEKN**-M**TK**L**Y**R**N**I**V**D**YL**SK**C**---Q**GK**GT**LV**V**ET**PA**E**---N**I**  
>Ci\_23575304 L**K**G**PAG**T**I**FI**HL**S**Q**SI**Y**EL**PN**---E**GYK**CR**V**AC**IKY**---S**IERG**--I**IG**EW**HQ**FI**N**:G**AIE**---L**GL**RA**EV**Q**V**HT**E**KT**H**R---S**ED**LY**S**---Q**GR**DD**-Y**R**N**I**W**KE**L**FL**FT**GS**D**---V**ENS**---L**LC**ME**N**---E**I**  
>Ci\_23576040 EVD**V**L**KEH**FI**IS**Q**S**L**Y**EL**PD**---E**GYL**CR**V**TC**VDY**---T**HGG**--I**EG**W**H**NI**ID**:G**AFK**---A**V**LM**SEV**K**FF**REG**THQ**---G**R**DC**E**---Y**ARS**N**-Y**Y**E**L**W**KE**L**V**A**F**I**R**Q**RS---Q**C**GR**T**LP**P**I**Y**CR**MS**---E**V**  
>Cs1\_in\_Ensembl (126-353) NMD**V**K**QEH**FI**IS**Q**S**L**Y**EL**PG**---E**GYL**CR**L**TC**VDY**---T**HSGG**--I**Q**NY**W**Q**II**DI**:G**AY**K**---P**VL**MS**EV**K**FF**ER**THQ**---S**R**DC**G**---L**ARS**D**-Y**Y**A**M**W**RE**L**V**A**F**I**R**G**AS**R**D**G**DR**I**PP**Y**SR**MS**---E**I**  
>Cs2\_in\_Ensembl (527-752) PEG**G**AST**VY**HI**IS**Q**S**L**Y**EL**PN**---E**GYK**CR**V**AC**IKY**---S**KRG**--V**IQ**W**H**RF**IN**:G**KIE**---L**GL**RA**BI**IC**Y**SE**T**Y**R**---S**E**EM**YK**---Q**FC**SR**-Y**T**A**M**M**EL**L**S**F**VE**D**E---A**D**SE**SL**PP**L**LC**ME**N---E**I**  
>Sp\_115675725 (110-291) GQD**I**TH**R**F**Y**MI**A**V**K**T**L**COL**P**---D**DTY**L**CR**L**AC**VE**Y**---T**MSAG**--I**TKR**FF**CF**P-----P**AE**W**F**D---Q**Y**N**H**N**-Y**K**E**W**T**D**L**I**A**F**I**N**P**Q---R**Q**H**V**MP**AL**E**C**EL**R**---C**R**  
>Gg\_118083700 (104-329) DQ**A**VL**AD**T**F**Y**FL**N**Y**S**H**G**L**PS**H**CD**Q**R**FL**:C**R**I**G**CV**KY**---S**QEG**--I**MA**D**F**HS**F**IN**:G**---R**GF**RF**H**C**QA**AS**D**SS**H**K**I**---P**S**GF**H**---L**S**RT**C**-Y**P**V**V**I**R**EL**L**Q**F**Q**AP**A---R**G**A**W**PR**F**Y**CK**SD---D**R**  
>Xt\_118404620 (121-346) NK**A**P**D**Q**H**VC**Y**FI**N**I**F**S**H**GD**M**PS**L**CE**QR**V**Y**:C**R**I**A**CV**RY**---S**REG**--I**L**GS**F**H**D**FI**D**:G**ELP**---R**GF**RF**H**C**Q**SS**G**AS**THQ**---P**S**GF**E**---L**ANS**D**-Y**H**N**M**FR**KL**CS**F**V**CP**T**---P**CP**V**V**Y**TK**AN---D**I**  
>Md\_126306192 (110-334) DQ**A**VL**GS**F**Y**FL**N**I**F**S**H**GE**L**PP**H**CE**QR**FL:C**R**I**G**CI**KY**---S**QEG**--I**VA**E**F**HR**F**IN**:G**EV**P**---R**GF**RF**H**C**QA**AS**D**SS**H**K**I**---P**S**NF**H**---S**G**DD**-Y**A**V**VL**Q**N**L**Y**R**FI**SP**N---Q**S**SW**PP**Y**CK**SD---D**R**  
>Ec\_149707838 (107-331) DQ**A**LL**GGI**F**Y**FL**N**I**F**S**H**GE**L**PP**H**CE**QR**FL:C**R**I**G**CV**KY**---S**QEG**--I**L**AD**F**HS**F**IN**:G**EV**P**---R**GF**RF**H**C**Q**AS**D**SS**H**K**I**---P**S**NF**E**---P**GR**D**-Q**A**V**VL**Q**N**L**Y**R**FI**SP**N---P**GS**W**PP**Y**CK**SD---D**R**  
>Bt\_84000365 (107-317) DQ**A**LL**GGI**F**Y**FL**N**I**F**S**H**GE**L**PP**H**CE**QR**FL:C**R**I**G**CV**KY**---S**QEG**--I**MA**D**F**HS**F**IN**:G**---D**SS**H**K**I---P**S**HF**E**---S**G**HD**-Q**A**T**VL**Q**N**L**Y**R**FI**HP**N---P**GN**W**PP**Y**CK**SD---D**R**  
>Mu\_109019354 (107-331) DQ**A**LL**GGI**F**Y**FL**N**I**F**S**H**GE**L**PP**H**CE**QR**FL:C**R**I**G**CV**KY**---S**QEG**--I**MA**D**F**HS**F**IN**:G**EV**P**---R**GF**RF**H**C**QA**AS**D**SS**H**K**I**---P**S**NF**E**---R**GH**N**-Q**A**T**VL**Q**N**L**Y**R**FI**HP**N---P**GN**W**PP**Y**CK**SD---D**R**  
>Rn\_109498972 (107-331) DQ**A**LL**GGV**F**Y**FL**N**I**F**S**H**GE**L**PP**H**CE**QR**FL:C**R**I**G**CV**KY**---S**QEG**--I**MA**D**F**HS**F**IN**:G**EV**P**---R**GF**RF**H**C**QA**AS**D**SS**H**K**I**---P**S**NF**E**---F**GH**D**-Q**A**T**VL**Q**N**L**Y**R**FI**HP**N---P**GN**W**PP**Y**CK**SD---D**R**  
>Hs\_20306906 (107-331) DQ**A**LL**GGI**F**Y**FL**N**I**F**S**H**GE**L**PP**H**CE**QR**FL:C**R**I**G**CV**KY**---S**QEG**--I**MA**D**F**HS**F**IN**:G**EV**P**---R**GF**RF**H**C**QA**AS**D**SS**H**K**I**---P**S**NF**E**---R**GH**N**-Q**A**T**VL**Q**N**L**Y**R**FI**HP**N---P**GN**W**PP**Y**CK**SD---D**R**  
>Mm\_29748051 (107-331) DQ**A**LL**GGI**F**Y**FL**N**I**F**S**H**GE**L**PP**H**CE**QR**FL:C**R**I**G**CV**KY**---S**QEG**--I**MA**D**F**HS**F**IN**:G**EV**P**---R**GF**RF**H**C**QA**AS**D**SS**H**K**I**---P**S**NF**E**---F**GH**D**-Q**A**T**VL**Q**N**L**Y**R**FI**HP**N---P**GN**W**PP**Y**CK**SD---D**R**  
>Cf\_73967029 (107-331) DQ**A**LL**GGI**F**Y**FL**N**I**F**S**H**GE**L**PP**H**CE**QR**FL:C**R**I**G**CV**KY**---S**QEG**--I**MA**D**F**HS**F**IN**:G**EV**P**---R**GF**RF**H**C**QA**AS**D**SS**H**K**I**---P**S**NF**E**---S**G**Y**D**-Q**A**T**VL**Q**N**L**Y**R**F**I**HP**N---P**GN**W**PP**Y**CK**SD---D**R**  
>Ss\_147901147 (107-331) DQ**A**LL**GGI**F**Y**FL**N**I**F**S**H**GE**L**PP**H**CE**QR**FL:C**R**I**G**CV**KY**---S**QEG**--I**MA**D**F**HS**F**IN**:G**EV**P**---R**GF**RF**H**C**QA**AS**D**SS**H**K**I**---P**S**HF**E**---S**G**HD**-Q**A**T**VL**Q**N**L**Y**R**FI**HP**N---S**G**K**W**PP**Y**CK**SD**---D**R**  
>Ce\_3873737 (525-803) ID**G**IR**DL**R**FL**L**A**S**V**Q**T**Y**GN**I---D**GE**C**M**AL**M**AM**N**EF---S**FSG**--I**V**E**K**F**H**A**I**V**G**:W**MP**E---S**ESH**RR**AS**R**H**A**L**E**TH**R---P**L**Q**NN**---F**AT**IT**-K**K**R**I**V**E**I**L**G**R**V**EP**S**(39)**N**DR**R**FI**VL**Q**SE**---L**D**  
>Cb\_39591559 (528-806) ID**G**IR**DL**R**FL**L**A**S**V**Q**T**Y**GN**I---D**GE**C**M**AL**GL**NE**F**---S**FSG**--I**IE**K**Y**H**A**I**V**G:W**Q**TD---N**ES**OR**RR**AS**R**H**A**F**E**TH**R**---P**L**Q**HS**---I**AT**VS**-K**R**K**L**V**E**I**L**G**R**V**EP**S**(39)**N**DR**R**FI**VL**Q**SE**---L**D**  
>Bm\_170586486 (160-295) LD**E**IR**R**AR**EL**FI**S**V**Q**T**Y**GN**V**---D**G**IC**I**AR**L**AI**CE**F---N**KHG**--I**IK**Y**T**SI**I**G:W**R**LN---N**E**I**OR**RR**AF**H**AN**E**TH**Q**I**---H**L**DM**F**G(6)**P**T**Q**NS**-V**LL**F**Y**FI**L**ER**IAS-----  
>Eh\_67477376 (315-532) E**I**N**I**F**EP**I**H**FF**D**EF**S**SS**K**---T**D**G**I**L**LE**L**G**IS**T**Y---Y**KEN**K**-E**IN**F**Y**H**T**L**IK**S**---S**YNT**S**F**ER**AV**G**V**H**G**---D**L**HM**N**---Y**T**Q**S**-Y**SE**I**E**GL**IN**Y**LS**N**S**F---K**G**KL**L**VL**K**D**E**---T**I**  
>Eh\_67476664 (42-258) A**Q**T**L**EN**G**V**F**H**F**Y**DF**E**Y**AA**Q**F---S**E**K**I**F**IE**I**G**IS**S**Y---S**KEN**K**-E**I**A**S**Y**H**K**L**L**Y**E**G---K**F**KN**V**F**A**R**T**Q**M**I**H**G---D**A**RD**P**---R**LE**Q**N**-Y**SL**V**C**I**E**L**I**K**Y**EQ**F**---P**GL**A**F**F**V**S**K**E**E**---S**L**  
>Eh\_67466465 (15-246) G**P**R**VE**Q**QL**FF**I**LD**F**Q**I**S**Y**K**T**---D**IC**T**V**:V**E**I**C**IK**P**---T**L**NG**T**I**N**I**EC**F**Q**T**I**I**N**Q**PI**---I**Q**H**FL**NS**K**H**Y**T**D**FE**H**G---S**Q**EN**N**P---V**P**Q**T**D**-P**D**F**W**KK**I**N**S**F**I**K**S**N**(5)**D**SS**M**L**P**I**VI**CT**P**---F  
>Eh\_67484628 (16-237) G**E**Q**A**I**K**Q**P**FF**I**DF**I**G**I**N**Y**T**T**---D**ET**CV**:I**E**I**C**I**Q**P**F---T**D**PS**A**EP**V**K**P**FL**Q**I**NE**V**V**P---S**Q**Y**LL**RA**K**Q**H**AD**FE**H**G**---T**P**EN**N**P---S**D**PT**D**-F**LL**L**W**N**T**I**N**N**F**I**W**T**F**(4)**G**E**A**F**V**P**I**VI**CL**S---F  
>Eh\_67477376 (12-227) E**I**I**T**ND**I**P**V**H**V**N**F**E**Y**C**A**R**A**---M**K**M**T**Y**:I**E**L**G**I**C**T**Y---K**M**SE**F**K**-L**L**G**E**F**H**Q**L**Y**CD---I**S**E**F**IN**K**Q**L**-T**N**H**H**G---D**S**K**S**Q---F**LR**K**D**-Y**K**N**I**V**N**L**M**K**Y**L**K**S**F**---S**N**N**I**Y**C**Y**V**K**R**K**E**---I**R**  
>Ed\_167389979 (315-532) E**I**N**I**F**EP**I**H**FF**D**EF**S**SS**K**---T**D**G**V**I**LE**L**G**IS**T**Y---Y**NES**K**-E**I**N**F**Y**H**T**L**IK**S---S**YNT**S**F**ER**AV**G**V**H**G**---D**L**HM**N**---Y**T**Q**S**-Y**SE**I**NG**L**IN**Y**LS**N**S**F---K**G**KL**L**VL**K**D**E**---T**I**  
>Ed\_167384018 (42-258) T**Q**T**L**EN**G**V**F**H**F**Y**DF**E**Y**AA**Q**F---S**E**K**I**F**IE**I**G**IS**S**Y---S**KEN**K**-E**I**N**S**Y**H**K**L**L**Y**E**G---K**F**KN**V**F**A**R**T**Q**M**I**H**G---D**A**RD**P**---R**LE**Q**N**-Y**SL**V**C**I**E**L**I**K**Y**EQ**F**---P**GL**A**F**F**V**S**K**E**E**---S**L**  
>Ed\_167391142 (15-246) G**P**R**VE**Q**QL**FF**I**LD**F**Q**I**S**Y**K**T**---D**IC**T**V**:V**E**I**C**IK**P**---T**L**NG**T**I**N**I**EC**F**Q**T**I**I**N**Q**PI**---I**Q**H**FL**NS**K**H**Y**T**D**FE**H**G---S**Q**EN**N**P---V**P**Q**T**D**-P**D**F**W**KK**I**N**S**F**I**K**S**N**(5)**D**SS**M**L**P**I**VI**CT**P**---F  
>Ed\_167395021 (16-237) G**E**Q**A**I**K**Q**P**FF**I**DF**I**G**I**N**Y**T**T**---D**ET**CV**:I**E**I**C**I**Q**P**F---T**D**PS**A**EP**V**K**P**FL**Q**I**NE**V**V**P---S**Q**Y**LL**RA**K**Q**H**AD**FE**H**G**---T**P**EN**N**P---S**D**PT**D**-F**LL**L**W**N**K**I**N**N**F**I**W**T**F**(4)**G**E**A**F**V**P**I**VI**CL**S---F  
>Ed\_167389979 (12-227) D**I**I**K**ND**I**P**V**H**V**N**F**E**Y**Y**A**R**T**---M**K**I**T**Y**:I**E**L**G**I**C**T**Y---K**M**SE**F**K**-L**L**G**E**F**H**Q**L**Y**CD---I**N**E**F**VD**K**K**I**-K**N**H**H**G---D**T**T**S**---F**LR**ND**-Y**K**N**I**V**N**L**M**K**Y**L**K**S**F---N**D**K**I**CC**Y**V**K**R**K**E---T**R**  
>Tv\_tviv441h03\_q1k\_3(253\_468) I**G**G**V**GN**A**I**F**V**S**FD**A**E**A**V**LV**SY---G**S**I**PL**AR**L**AI**L**V**P**---V**V**K**N**E---K**L**PP**FC**HL**E**:G**H**VE---D**CV**TA**IK**L**S**C**GL**VD**G**AR**CT**---P**F**K**C**AS---F**LR**RD**-Y**A**A**V**A**GE**I**N**R**FL**S**C-----K**Q**V**LV**IN**K**G---T  
>Th\_71748114 (363-570) M**G**GM**Q**NA**I**F**V**LD**V**E**A**AV**V**Q**K**---N**S**V**PL**AR**L**AI**L**V**P**---S**G**GD**H**---S**F**Q**P**FC**HL**E:G**V**IE---N**S**Q**V**AL**GL**S**C**GA**I**PS**SH**V---P**L**N**N**V**T**---F**LR**RD**-Y**T**K**V**A**E**I**S**Q**FL**S**C-----E**R**V**LV**IN**K**G---S  
>Tr\_congo1317f04\_p1k\_5(268\_485) R**G**GL**G**K**A**V**V**CF**D**E**A**AI**V**HR---N**CV**P**Q**AR**L**AI**L**V**P**---C**G**SN**H**---S**L**TH**Y**CF**HL**E:G**K**VV---D**NE**T**AL**K**L**S**C**GF**V**PS**SH**Y---P**F**Q**GS**AT---F**LR**RD**-Y**A**N**I**AN**D**L**R**S**FL**S**C-----E**C**V**V**IN**K**D---S  
>Lb\_LbrM35\_V2\_6220(281\_523) A**G**D**W**SN**I**T**V**A**VD**T**E**A**Y**AV**M**E---H**S**V**PL**AR**Y**AL**FL**P**I**(5)**S**T**SS**A---V**L**S**PL**FF**CH**:G**N**VE---A**BE**EN**V**Y**LN**CL**N**TH**L**---P**Y**HS**AT**---F**L**TD**N**F**Y**D**K**AV**L**V**D**R**Q**F**V**RN-----P**S**V**IL**IS**K**G(4)**P**  
Consensus/75% .....abbbsh...hphPhElth.pa...\*Lppt...bs.afhplpPs.....b.psb.hph.sh.l.sb.s.....hpps.b.lhplpIpaI.....lbs.pp.....
